# Supplementary material for: Preparation of a pure ZIF-67 membrane by self-conversion of cobalt carbonate hydroxide nanowires for H2 separation
Source: Royal Society of Chemistry journal article supplement (doi:10.1039/c8ce00238j), 2018-01-01
Supplement: c8ce00238j1.pdf [file c8ce00238j1.pdf]

## **Electronic Supplementary Information (ESI)**

### **Preparation of pure ZIF-67 membrane by self-conversion of cobalt carbonate hydroxide nanowires for H<sub>2</sub> separation**

Pei Nian, Yi Cao, Yujia Li, Xiang Zhang, Yanling Wang, Haiou Liu, Xiongfeng Zhang\*

*State Key Laboratory of Fine Chemicals, School of Chemical Engineering, Dalian University of Technology, Dalian, 116024, China.*

Corresponding author: xfzhang@dlut.edu.cn (X. Zhang)

## Supplemental Figures:

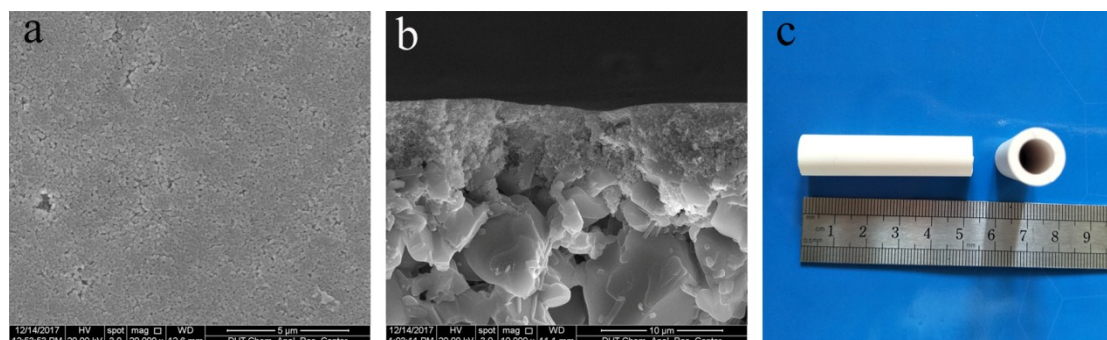

**Fig. S1** SEM images of the surface of the  $\alpha$ -Al<sub>2</sub>O<sub>3</sub> tube. (a) Top view; (b) Cross-section view and (c) photograph of the  $\alpha$ -Al<sub>2</sub>O<sub>3</sub> tube.

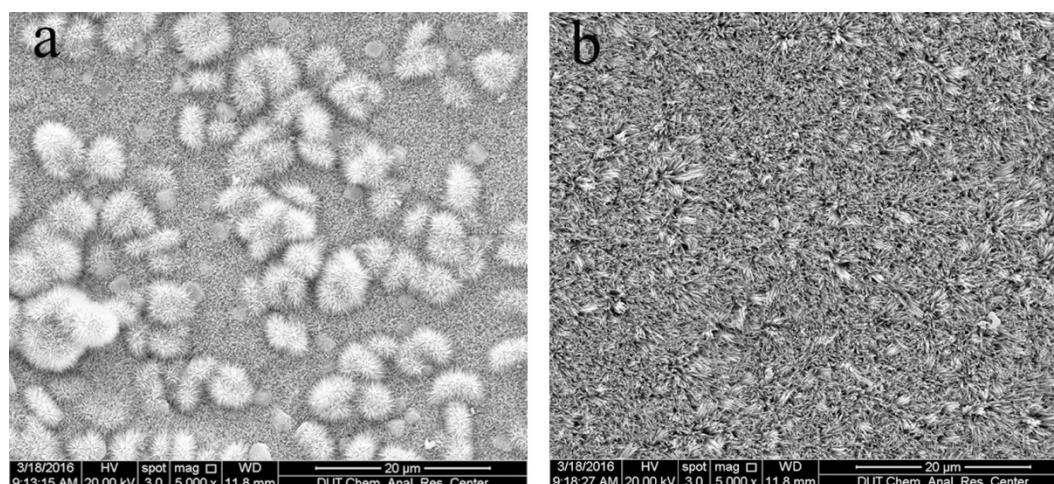

**Fig. S2** SEM images of the Co-NWAs grown on the  $\alpha$ -Al<sub>2</sub>O<sub>3</sub> tubes treated (a) without or (b) with APTES treatment.
